1 **Is execute attention affected by environmental lighting**  
2 **conditions?**

3

4 Nino Wessolowski<sup>1\*</sup> & Raschida Jasmin Rahim<sup>1</sup>

5

6

7 <sup>1</sup> MSH Medical School Hamburg, University of Applied Sciences and Medical  
8 University, Hamburg, Germany, Europe

9

10

11 \*Corresponding author

12 E-Mail: [nino.wessolowski@medicalschooll-hamburg.de](mailto:nino.wessolowski@medicalschooll-hamburg.de)

13

14

## 15 **Abstract**

16 Bright daylight has various positive influences, such as the long-term  
17 synchronization of circadian rhythms and an associated alertness that creates  
18 optimal conditions for attentional performance. However, the short-term effects  
19 of light on attention have not yet been sufficiently researched. Studies of these  
20 short-term effects on selective attention also showed partly contradictory effects.  
21 To investigate these short-term effects, 95 participants completed the Attention  
22 Network Test, under conditions of bright daylight or warm-white light. The focus  
23 of the present study was on executive attention, because this construct comes  
24 closest to the ANT short form of selective attention used. A significant  
25 enhancement of executive attention was observed under bright daylight  
26 conditions. This specifically means a short term effect of bright daylight on  
27 executive attention and thus selective attention in young adults.

28

## 29 **Introduction**

30 Natural sunlight affects humans, both physiologically and psychologically.  
31 Sunlight synchronizes the “internal clock,” influencing, among others, our sleep-  
32 wake cycle, mental energy, pleasure, motivation, and attention [1]. Therefore,  
33 artificial daylight is used indoors, to optimize room lighting or as a specific  
34 intervention in light therapy. Although field and laboratory studies have shown  
35 positive effects of intense artificial daylight on attention in different populations  
36 and under different conditions compared to neutral and warm white light and  
37 dimmed illuminance levels [2 - 9], not all investigations have yielded significant  
38 effects [9]

39 However, these empirical findings can only be explained theoretically to a limited  
40 extent, because the mechanism of light interventions during the day are still the  
41 subject of controversy [2,8]. Even those studies that point beneficial artificial light  
42 effects [3,7] have yielded heterogeneous results on individual subscales of the  
43 frequently administered d2 test of attention [10]: Increase in the speed-based total  
44 value (KL) vs a reduction in the error rate (F). Among the various possible causes  
45 underlying the diversity of extant findings, methodological differences in rather  
46 global forms of assessment of the construct of attention, particularly deserve  
47 closer consideration. The present study, therefore, investigates the effects of  
48 daylight on executive attention by employing an established and highly robust  
49 method resistant to confounders.

## 50 **1.1 Pathways of the effect of light on human behavior**

51 Regarding the general effects of light on human behavior, three different  
52 explanations are currently discussed [3,8].

53 (1. Visual pathway) In the retina light hits the retinal cones responsible for the  
54 perception of color and the retinal rods responsible for the perception of  
55 brightness; these impressions are then transmitted through the ganglion cells and  
56 through the optical nerve to reach the visual center in the occipital lobe, where a  
57 visual impression emerges [11]. An increase in illuminance results in an  
58 improvement in visual perception by means of increased brightness and color  
59 contrasts [12], which can in turn counteract visual impairments to some degree  
60 [13]. In addition, increased illuminance can also alleviate signs of fatigue as well  
61 as eye pain and headaches [12,13]. In the present study, this explanation is the  
62 visual pathway less possible. This is due to the absence of any change in the  
63 illuminance of the monitor, only that of the environmental condition. However,  
64 the improvement in vision by increasing the illuminance could be partly  
65 responsible for the effects of the reference studies that conducted paper-based  
66 attention tests.

67 (2. Neurobiological non-visual pathway) In addition to the retinal rods and cones,  
68 a third type of receptor has been identified at the retina, the intrinsically  
69 photosensitive retinal ganglion cells [14–16]. These receptors cover the retina like  
70 a spider web and are directly linked to the suprachiasmatic nucleus via the  
71 retinohypothalamic tract. This nucleus is the primary clock for all circadian body

72 functions and controls these functions through the hormones melatonin and  
73 cortisol as well as the cryptochrome proteins CRY and PER [11]. Melatonin is  
74 produced in the pineal gland from the precursor serotonin and is suppressed by  
75 light. Cortisol is controlled indirectly through the release of adrenocorticotrophic  
76 hormone, and its rhythm is roughly opposite that of melatonin release.  
77 Furthermore, the exact temporal course of light incidence on the retina, from  
78 changes in neuronal and hormonal activity to manifest changes in perception and  
79 behavior, is not yet fully clarified. In addition to the duration and intensity of  
80 exposure, individual and situational factors play a major factor [17,18].

81 (3. Psychological Pathway) Light may yield psychological effects by mechanisms  
82 of classical conditioning [19] and mood [17,18]. For example, dark-warm light  
83 like an open fire has been associated with cozy memories, yielding states of  
84 relaxation, etc. Dark and cold light, like in the cellar, is paired with unpleasant  
85 experiences and reminds one of fear or depression [19]. Bright daylight is linked  
86 to activity and creates a mood that increases concentration [17,18]. Knez [17], for  
87 example, showed a connection between light, mood and attention. The results of  
88 this study showed that a colour temperature which induced the least negative  
89 mood enhanced the performance in the long-term memory and problem-solving  
90 tasks, that require selective attention.

91 The mechanisms of the effect of light on immediate experiential and behavioral  
92 changes during the day are finally not clear. In addition to the duration and  
93 intensity of light exposure, individual and situational factors also interact in light

94 application in everyday life: for example, age and gender [17,18] as well as  
95 anatomical characteristics [1], have an influence on the effect of light as individual  
96 factors. Situational factors of light applications include the location, occasion, and  
97 setting, as well as the form of the relationship with the people involved [20].  
98 Output arousal may also play an important role in the effect of light on humans,  
99 especially in the stress response. A connection between light, attention and  
100 arousal was found [21,22].

101  
102 Also the exact connection between light as a zeitgeber for circadian functions and  
103 immediate changes in short-term behavior during the day has not yet been  
104 completely clarified. However, the fact that short-term light interventions during  
105 the day also activate brain areas belonging to the circadian system [23] as well as  
106 studies have shown that light interventions during the day can influence alpha  
107 waves in the brain [24,25]. The research goal is to find further evidence at the  
108 behavioral level for the effect of light during the day.

109

## 110 **1.2 Previous studies on the attentional effects of light**

111 While there are fewer studies of high quality in adults, initial controlled studies  
112 on the use of artificial daylight in school settings showed that light supports  
113 attention in the age group of children and adolescents. For instance, Barkmann,  
114 Wessolowski, and Schulte-Markwort [3] examined the effect of artificial daylight  
115 on attention-related task performance in the setting of a field study in primary and

116 secondary schools. Among other lighting conditions in variable light, a daylight  
117 condition (1060 lx and 6500 K) was compared with a control condition (300lx  
118 and 4000K). In a sample of 110 pupils, the concentration performance (CP;  
119 number of detected target items minus omission errors searching through lines of  
120 characters for prespecified target items) was measured using the d2 test of  
121 attention [10] and the ELFE 1-6 [21] as well as the LGVT 6-12 [22] reading tests.  
122 Under artificial daylight, there were significantly fewer errors (missed target  
123 items and false marked characters) in the d2 test of attention and significantly  
124 more words read in the reading tests. No effects were found in the lines processed  
125 per time unit (edited target items) and CP of the d2 test of attention.

126 A supplementary laboratory study by Wessolowski [26] showed comparable  
127 results in 95 adult students with significant effects of small size in overall error,  
128 omission errors and, contrary to the analogous field study, in working speed.

129 The first of three experiments of Slegers, Moolenaar, Galetzka, Pruyn, Sarroukh  
130 and van der Zande [7] was a quasi-experimental field study with  $n = 98$  students  
131 in grades 4 and 6 ( $M=10.0$  years) from one elementary school. In total, the d2 test  
132 of attention was administered at three different time points (pre-measurement,  
133 first post-measurement, second post-measurement) under different light  
134 conditions in an intervention and a control group. The interval between pre- and  
135 post-measurements was one month, the interval between the two post-  
136 measurements one week. In the pre-measurement, the “standard” light program  
137 (300lx and 3000-4000K) was used for both groups. In the post-measurements, a

138 daylight program (1000lx and 6500K) was used in the intervention group, while  
139 the “standard” light program was used in the control group. The intervention  
140 group scored significant better (large effect sizes) on d2 overall error and CP  
141 compared to the control group. In the second experiment of Slegers et al., n = 37  
142 students at the age of 10 years from two schools were examined with otherwise  
143 the same procedure, light conditions and measuring instruments as in the first  
144 experiment. The results of this second experiment largely replicated those of the  
145 first experiment. The third experiment realized a randomized design in a darkened  
146 lecture room with a total of n = 55 students from six schools. No significant effects  
147 were found in terms of overall error, speed or CP.

148 The aim of the study by Auras, Barkmann, Niemeyer, Schulte-Markwort and  
149 Wessolowski [2] was to test specific light interventions on attention in the Child  
150 and Adolescent Psychiatry. Using a quasi-experimental A-B-A-B study design, a  
151 daylight programme (A) with high illuminance (5312 K, 793 lx) was tested  
152 against a comparative light programme (B; 4081 K, 378 lx). CP, overall errors  
153 and working speed of 30 patients (age M = 11.5 years) was assessed using the d2  
154 test of attention of [10] and subjective self-assessment for attention and stress  
155 level was recorded using questionnaires. In the d2 test of attention there were  
156 significant improvements of medium size under the daylight programme  
157 condition in CP and working speed but there were no effects in overall errors. The  
158 subjective self-assessments, on the other hand, showed a decrease in  
159 concentration and an increase in stress and fatigue under daylight conditions.



160 Weitbrecht, Bärwolff, Lischke and Jünger [9] investigated the influence of the  
161 correlated color temperature of light on concentration and creativity in  $n = 50$   
162 students and employees. The three light scenarios (3000 K, 4500 K, 6000 K) were  
163 given with a constant illuminance of 1000 lx in a darkened room by an LED  
164 surface area light. Among others, the d2-bq test (short form of d2 test of attention),  
165 a creativity test [28], a word test (in which words of a certain category must be  
166 recognized in a box with letters) [29] and a logic test [28] were used. The order  
167 of the three light scenarios was randomized. In the d2-bq test, no significant  
168 differences were found between the light conditions. Under the warm light  
169 condition (3000 K), improvements in the creativity test were observed compared  
170 to the conditions of 4500 K and 6000 K. Significant advantages in favor of the  
171 daylight condition (6000 K) were found in the word test, which also requires  
172 attention. In the logic test (also attributed to creativity), the highest performance  
173 was achieved at 3000 K compared to 4500 K and 6000 K. Accordingly, the  
174 authors conclude that performance improvements were significant in terms of  
175 creativity in warm light (3000 K) and in terms of attention in light with higher  
176 blue content (4500 K, 6000 K), even though their results failed to reach the level  
177 of significance.

178 In summary, five of six studies using the d2 test of attention found significant  
179 effects when comparing performance under conditions of bright daylight. But  
180 these findings appear somehow inconsistencies. While Slegers et al. [7]  
181 found effects both in CP and in the decrease of overall errors, Barkmann et al. [3]

182 only found effects in the decrease of overall errors, Wessolowski [26] found  
183 effects in overall errors and working speed and Auras et al. [2] found an increase  
184 in CP and no decrease of overall errors.

185 It should be noted, however, that the performance measures provided by the d2  
186 test are unspecific with regard to the underlying attentional processes and were  
187 observed in children and adolescents.

188

#### 189 **1.4 Questions and hypotheses of the present study**

190 The results of controlled light studies in children and adolescents speak for an  
191 effect of daylight on attention. However, participants subjectively report more  
192 stress [2] and the objective effects are found on different scales of the d2 attention  
193 test. Perhaps because the increase in performance due to daylight is at the expense  
194 of the perception of stress? Furthermore, controlled light studies in the age group  
195 of adults are lacking. Therefore, the present study is intended to clarify more  
196 precisely the impact of light on young adults. In addition, this study aims to  
197 understand the effect of light on the process of executive attention. Therefore, we  
198 analyzed executive attention with the Attention Network Test (ANT) [30] in short  
199 form more elaborately than was previously the case with the d2 test of attention.  
200 The d2 test measures rather broadly and less process-specific. This could also  
201 explain the heterogeneous d2 findings of the previous studies. We assume that  
202 congruency (executive Attention) in the ANT comes closest to the construct of  
203 selective attention in the d2 test of attention. The ANT combines two of the

204 classical paradigms of visual attention (i.e., the Posner and Eriksen paradigms).  
205 In addition to Executive Function, the ANT incorporates the Orienting and  
206 Alerting networks. In principle, light effects can also be expected for these factors  
207 [31,32]; however, due to the short duration of the experiment [30], it is possible  
208 that these effects can only be detected minimally or not at all. Fan et al. [30]  
209 demonstrated that an enhancement in the performance of executive attention tasks  
210 correlates with the activation of the anterior cingulate cortex (ACC) in the human  
211 brain. If a discernible light effect is observed in the current experiment concerning  
212 executive function, this would provide additional evidence for the biologically  
213 non-visual function in short-term light effects and further support for the short-  
214 term activation of the circadian system, as both the SCN and ACC are constituents  
215 of the limbic system [11]. Based on observations during previous studies [2], we  
216 also explicitly surveyed subjective stress perception during light exposure using  
217 questionnaires. This is important because stress affect performance. The Yerkes  
218 and Dodson law shows an inverted u-shaped relationship. This implies that  
219 performance initially rises in proportion to stress, and above a medium level of  
220 stress, performance reaches its best value; if stress now continues to rise, this  
221 increasingly leads to losses [27].

222

223 In sum, the present study aimed to answer the following three questions: 1. Are  
224 higher performances in executive attention observed under bright daylight than  
225 under dimmed warm light conditions? 2. What effects can be observed in relation

226 to orienting and alerting? 3. Are the two lighting conditions associated with

227 different levels of subjective stress.

228

## 229 **Materials and Methods**

### 230 **2.1 Sample**

231 The sample size was determined by an a-priori power analysis. Using G-Power  
232 [33], this showed an optimum sample size of  $n = 788$  with expected small effects  
233 and  $p < .05$ . Since such a large sample has to be collected over several years in  
234 the complex laboratory experiment, the present study monitors the effects after  
235 data collection in the first semester.

236 A sample was recruited from Bachelor and Master students, their families and  
237 friends. All  $n = 91$  participants were included in all analyses because there were  
238 no missing data. The large proportion of psychology students (75.8 %) and the  
239 high proportion of women (72.6 %) should be accentuated (see Table 1). None of  
240 the control variables showed any significant correlations with the ANT Outcome  
241 (target variables), so that these variables were not included as covariates in the  
242 analyses.

243

244 **Table 1. Sample information.**

|                             | BL             | WL             | total          | Significance between groups                                 |
|-----------------------------|----------------|----------------|----------------|-------------------------------------------------------------|
| n (%)                       | 53<br>(58.2)   | 38<br>(41.2)   | 91<br>(100.0)  | $X^2 = 2.473, df = 1, p = .116$                             |
| age in years M<br>(SD)      | 22.4<br>(1.77) | 23.3<br>(2.52) | 22.7<br>(2.12) | $T = 1.933, df = 1, p = .056, d = .411, CI: -0.011 - 0.831$ |
| sex f/m in %                | 76.8/23.2      | 66.7/33.3      | 72.6/27.4      | $X^2 = 0.552, df = 1, p = .457$                             |
| Students of psychology in % | 69.2           | 80.4           | 75.8           | $X^2 = 4.526, df = 1, p = .033^*$                           |

245  
246 Notes. BL = bright daylight, WL = dim warm light, T = T-Test (two tailed), X2 =  
247 Chi-Square Distribution.

248

249

250 **2.1 Design and Materials**

251 The study took place in the laboratory of the Medical School Hamburg (MSH) in  
252 four identical sound insulated and ventilated test cabins (180 cm long and 220 cm  
253 high, light grey inner walls) (see Figure 1). A 72 x 35 cm cabin window was  
254 located behind the participants (left of the door). The cabin windows were facing  
255 away from the windows of the laboratory room (north-east), so that barely any  
256 natural daylight (see control variables) would enter the cabins (maximum value  
257 determined over all measurements: 30 lx). The cabins are each equipped with two  
258 chairs, one table, one computer, one screen, and two lamps.

259

260 **Please insert figure 1 here.**

261 **Figure 1: Cabin in the laboratory of the Medical School Hamburg (Picture**  
262 **by Johanna Hänsel).**

263

264

265 **Please insert figure 2 here.**

266 **Figure 2: Cabin in the laboratory with experimental condition bright**  
267 **daylight (Picture by Nilay Dermidal and Ricardo Frink).**

268

269 **Please insert figure 3 here.**

270 **Figure 3: Cabin in the laboratory with control condition dim warm light**  
271 **(Picture by Nilay Dermidal and Ricardo Frink).**

272

273 The hardware was a Lenovo PC (Intel (R) Pentium (R) CPU G 3220 @ 3.00 Ghz,  
274 RAM: 4.0 GB) with Windows 7 Professional (64 Bit) and a computer monitor  
275 with a 22" LCD screen. The ANT (see below) was controlled and presented with  
276 the experimental software E-Prime 2.0 (Psychology Software Tools, Inc.).

277 As illustrated in Figures 1-3, the lighting for the experimental condition bright  
278 daylight was provided by two off-the shelf floor lamps (Ikea Not) which were  
279 equipped with two compact fluorescent lamps (one Philips T65 Softone Cool  
280 Daylight E27 20W 865 and one Philips Genie Cool Daylight E14 8W 865) and a  
281 surface mounted light (Luxero T5LL-21 W) with a fluorescent tube (FSL 21W

282 865/0). The light for the control condition dim warm-white was operationalized  
283 by the lefthand floor lamps (see Figure 3). This condition is equipped with another  
284 compact fluorescent lamp (Philips Tornado E14 12W 827). The movable arms of  
285 the floor lamps with the E14 sockets were fixed to the cabin interior in both  
286 conditions with the light cone aligned to the ceiling. The operationalization of the  
287 lighting conditions is discussed in 4.3 Limitations.

288 The cabins were equipped with a measuring device ALP-01 from Asensetek  
289 Lighting Passport. The illuminance and color temperature were measured  
290 horizontally on the work surface. Under the bright daylight (BL) experimental  
291 condition, an average of 517.0 lx / 5417 K was measured. This generated a  
292 condition with high illuminance and daylight color as well as a correspondingly  
293 high blue component (see Figure 2). An average of 67.5 lx / 2628 K was measured  
294 under the dim warm-white (WL), control condition resulting in low illuminance  
295 and warm-white color temperature with a correspondingly high red component  
296 (see Figure 3).

297

## 298 **2.2 Dependent Variables**

299 In this study the ANT-Short was used [30]. Participants were instructed to react  
300 as quickly as possible to the direction of a middle arrow on a computer screen and  
301 click with the left or right thumb on the left or right mouse button.

302 The Conflict effect (**Executive attention**) is calculated by the difference in  
303 reaction times between trials with congruent arrows and incongruent arrows [30].  
304 The stimuli are illustrated in Figure 4.



305 The **Orienting** effect is calculated by the difference in reaction times  
306 between trials with a center cue and spatial cue [30]. The stimuli are illustrated in  
307 Figure 5.

308 The **Alerting** effect is calculated by the difference in reaction times  
309 between trials with no cue and a center cue [30]. The stimuli are also illustrated  
310 in Figure 5.

311

312 **Please insert figure 4 here.**

313

314 **Figure 4 (a-h): congruent bottom (a-b), incongruent bottom (c-d), congruent**  
315 **top (e-f), incongruent top (g-h).**

316

317

318 **Please insert figure 5 here.**

319

320 **Figure 5 (a-d): no cue – only fixation cross (a), center cue (b), spatial cue**  
321 **bottom (c), spatial cue top (d).**

322

323

324 Based on the findings in the previous studies, ratings of **acute stress** were  
325 also obtained. The scale rest and restlessness of the multidimensional state  
326 questionnaire (MBDF) [34] was used. Self-formulated short scales were used to

327 determine the following control variables: long-term stress, consumption of  
328 caffeine intake, chronotype, night sleep, nationality, mother tongue,  
329 glasses/contact lenses, left/right-handedness, and chronic diseases. In further  
330 details sunshine hours duration of the day [35], room temperature (temperature),  
331 date and time were recorded. Additionally, pulse and blood pressure were  
332 measured with blood pressure monitors (Sanitas SBC 15).

333

## 334 **2.4 Procedure**

335 The data collection took place from 20.04.2021 to 16.05.2021. The light condition  
336 was determined at random (coin toss). Accordingly, the luminaires were therefore  
337 fitted with the appropriate lamps for lighting condition, switched on and the room  
338 temperature measured. To ensure that the initial conditions were as comparable  
339 as possible and to allow the light exposure to take effect. The adult participants  
340 were informed in both written and verbal form about the study and gave their  
341 written consent. The participants were first asked to complete questionnaires. This  
342 should result in a total acclimatization and exposure of about 10 minutes before  
343 the actual experiment. The experimenter stayed in the cabin during the instruction  
344 of the ANT and the test trial. Afterwards pulse and blood pressure were measured.  
345 Then the experimenter left the cabin and the participants completed the  
346 experiment, consisting of three ANT blocks each containing 48 trials. Each of  
347 these blocks was followed by a response on the scale of calm / restlessness. Pulse

348 and blood pressure values were measured for the second time and afterwards the  
349 participant was send-off.

350

## 351 **2.5 Ethics**

352 The experiment was conducted in accordance with the Declaration of Helsinki  
353 and was approved by the Ethics Committee of Medical School Hamburg (**MSH-**  
354 **2020105**).

355

## 356 **2.6 Statistics**

357 An analysis of variance (ANOVA between subjects) was used. A Huynh-  
358 Feldt correction was used when the sphericity assumption was violated. The  
359 dependent variables were successfully tested for normal distribution by testing  
360 kurtosis and skewness.

## 361 Results

### 362 3.1 Analysis of the ANT

363 Table 2 shows a significant effect of small size in the main variable of interest,  
364 executive function, in favor of the bright daylight group. This means that an  
365 average participant in the bright light group has a 11.3% shorter time difference  
366 between the congruence and no congruence conditions than an average participant  
367 in the control group with dimmed warm white light. The small effect for orienting  
368 (n.s.) and the absence of an effect for alerting are as expected.

369

370

371 Table 2

372 *Analysis of the ANT (reaction time).*

|                     | n  | BL M (S)     | WL M (S)      | F     | df | p     | $\eta_p^2$ |
|---------------------|----|--------------|---------------|-------|----|-------|------------|
| Executive attention | 91 | 89.7 (0.11)  | 101.2 (26.60) | 3.990 | 1  | .049* | 0.043      |
| Orienting           | 91 | 56.6 (28.79) | 65.5 (27.60)  | 2.108 | 1  | .150  | 0.023      |
| Alerting            | 91 | 22.1 (21.04) | 19.6 (22.79)  | 0.258 | 1  | .613  | 0.003      |

373

374 Notes. BL = bright daylight, WL = dim warm light, F = F-Value of ANOVA (two tailed),  $\eta_p^2$  = Partital

375 Eta Squared.

376

## 377 3.2 Stress

378

379 Table 3 shows that there was no significant light effect (time\*group) on the  
380 perceived stress of the participants during the test. In contrast, a significant effect  
381 of small size was found for the time course.

382

383 Table 3

384 *Analysis of perceived stress.*

|    | n  | BL M (S)   | WL M (S)   | F     | df | p          | $n_p^2$ |
|----|----|------------|------------|-------|----|------------|---------|
| t0 | 91 | 1.4 (0.83) | 1.2 (0.78) |       |    | time       |         |
| t1 | 91 | 1.6 (0.81) | 1.4 (0.75) | 3.644 | 3  | .018       | .039    |
| t2 | 91 | 1.5 (0.74) | 1.3 (0.81) |       |    | time*group |         |
| t3 | 91 | 1.4 (0.73) | 1.3 (0.72) | 0.391 | 3  | .728       | .004    |

385

386 Notes. BL = bright daylight, WL = dim warm light, F = ANOVA (repeated measures), Huynh-Feldt

387 correction,  $n_p^2$  = partial Eta Squared.

388

## 389 4. Discussion

### 390 4.1 Main Results

391 The present study investigates whether higher performances observed in  
392 attentional functions under bright daylight than under dim warm light and whether  
393 stress perception is different between the light conditions. The anticipated impact  
394 on executive function in favor of the bright daylight condition, compared to the  
395 dimmed warm white light condition, can be confirmed. As anticipated, the

396 orienting effect is smaller in this experiment, and no alerting effect is observed.

397 No light effect was observed in relation to stress.

398

399

## 400 **4.2 The relationship of the present results with previous studies and** 401 **the pathways of the effect of light on human behavior.**

402 The observations of Auras et al. [2] that daylight interventions subjectively lead  
403 to higher stress levels could not be confirmed in this study. No effect in the stress  
404 load was found. Presumably, the effect of light on the perception of stress depends  
405 on the state of arousal. Highly stressed people like the children in the psychiatric  
406 hospital in the study by Auras et al. [2] may first need a calming dimmed warm  
407 white light. However, the setting and the experimental population showed  
408 considerable differences between the present study and the reference study, so  
409 that further research on this question is necessary.

410

## 411 **4.3 Limitations**

412 In contrast to the preliminary studies, this study administered a computer-based  
413 test, whereas the reference studies are based on paper pencil tests [3,7,23]. In  
414 addition, the monitors emitted white light as screen background regardless of the  
415 lighting condition administered. So the contrast between the light conditions was  
416 not as pronounced as in the reference studies. In addition, the daylight condition  
417 in the reference studies by Barkmann et al. [3] and Slegers et al. [7] were

418 approximately twice as intense with approximately 1000 Lux. In the study of  
419 Auras et al. [6], the daylight condition was also significantly brighter (793 lux) as  
420 was the case with Wessolowski [23], with almost 1300 lx. This could have  
421 resulted in possible effects of the light that could not be represented reliably.  
422 Another limitation is that the lighting conditions were not generated from only  
423 one luminaire as in Barkmann et al. [3] and Slegers et al. [7] but from different  
424 luminaires. Thus, other lighting parameters varied except for illuminance and the  
425 most similar color temperature. However, the present study was carried out  
426 entirely without funding from the lighting industry and was financed entirely from  
427 the authors' private funds. This is certainly not ideal for an experiment, but the  
428 change of the lighting situation by different favorable light sources corresponds  
429 to frequent practice in real life.

430

431 The data collection took place in spring and early summer. Although the test  
432 cabins were largely isolated from natural daylight, the participants were certainly  
433 influenced by natural daylight experienced previously outside the lab. It is  
434 conceivable that natural daylight outside the experiment was much more effective  
435 than artificial light in the experiment and caused strong undesired stimulation,  
436 especially in the control condition. For example, Kent et al. demonstrated a  
437 significant correlation between natural daylight exposure of the participants, as  
438 measured by NASA satellites, and their performance on cognitive tests [36].  
439 Although an influence of sunshine duration (local weather data) on the test results

440 could not be determined (not shown here), it seems conceivable that our results  
441 are conflated by previous exposure to bright daylight.

442

443

#### 444 **4.4 Summary**

445 In terms of executive attention in the ANT test utilized, the results favored the  
446 daylight condition. Since the test was computerized for both the daylight and  
447 warm white light groups with constant monitor settings, the effect cannot be  
448 solely attributed to the visual impact of light. Light seems to directly affect  
449 executive attention and presumably selective attention, with activation observed  
450 in the anterior cingulate cortex (ACC) [37], a component of the circadian system.  
451 Van der Valle also demonstrates that short-term light interventions result in the  
452 activation of brain regions associated with the circadian system [23]. This  
453 suggests that the short-term impact of light on attentional performance may share  
454 a similar biological, non-visual pathway with the circadian effect of light.

455 A non-significant effect of small magnitude was observed for orienting, and no  
456 effect was found for alerting, potentially attributable to the brief duration of the  
457 experiment. In principle, the experiment should be expanded on a larger scale and  
458 with more pronounced light contrasts. The lighting scenarios do not appear to  
459 influence subjects' stress perception, at least not in this experiment; however, this  
460 could be attributed to sample size, experimental setting, and participants' arousal  
461 levels.



462

463

## 464 **References**

465 1. Rea MS. Light - Much More Than Vision. 2002 [cited 1 Jan 2002].

466 Available:

467 <https://pdfs.semanticscholar.org/db8f/5ba0be450279bce83054781b513a70fc35ff>  
468 .pdf

469 2. Auras MI, Barkmann C, Niemeyer M, Schulte-Markwort M, Wessolowski  
470 N. [Efficacy of variable light in child and adolescent psychiatry]. *Z Für Kinder-*  
471 *Jugendpsychiatrie Psychother.* 2016;44: 148–157. doi:10.1024/1422-  
472 4917/a000409

473 3. Barkmann C, Wessolowski N, Schulte-Markwort M. Applicability and  
474 efficacy of variable light in schools. *Physiol Behav.* 2012;105: 621–627.  
475 doi:10.1016/j.physbeh.2011.09.020

476 4. Boyce PR, Beckstead JW, Eklund NH, Strobel RW, Rea MS. Lighting the  
477 graveyard shift: The influence of a daylight-simulating skylight on the task  
478 performance and mood of night-shift workerst. *Light Res Technol.* 1997;29:  
479 105–134. doi:10.1177/14771535970290030501

480 5. Figueiro M, Rea MS, Boyce P, White R, Kolberg K. The effects of bright  
481 light on day and night shift nurses' performance and well-being in the NICU.  
482 *Neonatal Intensive Care.* 2001;14: 29–32.

483 6. Fleischer SE. Die psychologische Wirkung veränderlicher  
484 Kunstlichtsituationen auf den Menschen. Doctoral Thesis, ETH Zurich. 2001.  
485 doi:10.3929/ethz-a-004122647

486 7. Slegers P, Moolenaar N, Galetzka M, Pruyn A, Sarroukh B, van der

- 487 Zande B. Lighting affects students' concentration positively: Findings from  
488 three Dutch studies. *Light Res Technol.* 2013;45: 159–175.  
489 doi:10.1177/1477153512446099
- 490 8. Wessolowski N, Koenig H, Schulte-Markwort M, Barkmann C. The  
491 effect of variable light on the fidgetiness and social behavior of pupils in school.  
492 *J Environ Psychol.* 2014;39: 101–108. doi:10.1016/j.jenvp.2014.05.001
- 493 9. Weitbrecht WU, Bärwolff H, Lischke A, Jünger S. [Effect of Light Color  
494 Temperature on Human Concentration and Creativity]. *Fortschr Neurol  
495 Psychiatr.* 2015;83: 344–348. doi:10.1055/s-0035-1553051
- 496 10. Brickenkamp R. *Aufmerksamkeits-Belastungs-Test d2.* 2002 [cited 26  
497 Nov 2019]. Available: [https://www.testzentrale.de/shop/test-d2-  
498 aufmerksamkeits-belastungs-test.html](https://www.testzentrale.de/shop/test-d2-aufmerksamkeits-belastungs-test.html)
- 499 11. Pinel JPJ. *Biopsychology.* Needham Heights, MA: Allyn & Bacon; 1990.
- 500 12. Goldstein EB. *Sensation and perception, 4th ed.* Belmont, CA: Thomson  
501 Brooks/Cole Publishing Co; 1996.
- 502 13. van Bommel W, van den Beld G. Lighting for work: a review of visual  
503 and biological effects. *Light Res Technol.* 2004;36: 255–266.  
504 doi:10.1191/1365782804li122oa
- 505 14. Berson DM, Dunn FA, Takao M. Phototransduction by retinal ganglion  
506 cells that set the circadian clock. *Science.* 2002;295: 1070–1073.
- 507 15. Brainard GC, Hanifin JP, Greeson JM, Byrne B, Glickman G, Gerner E,  
508 et al. Action spectrum for melatonin regulation in humans: evidence for a novel  
509 circadian photoreceptor. *J Neurosci.* 2001;21: 6405–6412.
- 510 16. Hattar S, Liao HW, Takao M, Berson DM, Yau KW. Melanopsin-  
511 containing retinal ganglion cells: architecture, projections, and intrinsic

- 512 photosensitivity. *Science*. 2002;295: 1065–1070.
- 513 17. Knez I. Effects of indoor lighting on mood and cognition. *J Environ*  
514 *Psychol*. 1995;15: 39–51. doi:10.1016/0272-4944(95)90013-6
- 515 18. Knez I, Enmarker I. Effects of office lighting on mood and cognitive  
516 performance and a gender effect in work-related judgment. *Environ Behav*.  
517 1998;30: 553–567. doi:10.1177/001391659803000408
- 518 19. Baron RA, Rea MS, Daniels SG. Effects of indoor lighting (illuminance  
519 and spectral distribution) on the performance of cognitive tasks and  
520 interpersonal behaviors: The potential mediating role of positive affect. *Motiv*  
521 *Emot*. 1992;16: 1–33. doi:10.1007/BF00996485
- 522 20. Biner PM, Butler DL, Fischer AR, Westergren AJ. An arousal  
523 optimization model of lighting level preferences: An interaction of social  
524 situation and task demands. *Environ Behav*. 1989;21: 3–16.  
525 doi:10.1177/0013916589211001
- 526 21. Cajochen C. Alerting effects of light. *Sleep Med Rev*. 2007;2007: 453–  
527 464.
- 528 22. Smolders KCHJ, de Kort YAW. Bright light and mental fatigue: Effects  
529 on alertness, vitality, performance and physiological arousal. *J Environ Psychol*.  
530 2014;39: 77–91. doi:10.1016/j.jenvp.2013.12.010
- 531 23. Vandewalle G, Maquet P, Dijk D-J. Light as a modulator of cognitive  
532 brain function. *Trends Cogn Sci*. 2009;13: 429–438.  
533 doi:10.1016/j.tics.2009.07.004
- 534 24. Sahin L, Wood BM, Plitnick B, Figueiro MG. Daytime light exposure:  
535 Effects on biomarkers, measures of alertness, and performance. *Behav Brain*  
536 *Res*. 2014;274: 176–185. doi:10.1016/j.bbr.2014.08.017

- 537 25. Okamoto Y, Rea MS, Figueiro MG. Temporal dynamics of EEG activity  
538 during short- and long-wavelength light exposures in the early morning. BMC  
539 Res Notes. 2014;7: 113. doi:10.1186/1756-0500-7-113
- 540 26. Wessolowski N. Wirksamkeit von Dynamischem Licht im  
541 Schulunterricht. Dissertation, Universitätsklinikum Hamburg-Eppendorf. 2014.  
542 Available: [ediss.sub.uni-hamburg.de/volltexte/2014/6759/pdf/Dissertation.pdf](http://ediss.sub.uni-hamburg.de/volltexte/2014/6759/pdf/Dissertation.pdf)
- 543 27. Kaluza G. Stressbewältigung: Das Manual zur psychologischen  
544 Gesundheitsförderung. 5., vollst. überarb. Aufl. 2023 Edition. Berlin  
545 Heidelberg: Springer; 2023.
- 546 28. Hesse J, Schrader HC. Testtraining Konzentrationsvermögen. Frankfurt:  
547 Eichborn.exakt; 1999.
- 548 29. Moosbrugger H, Kelava A. Testtheorie und Fragebogenkonstruktion.  
549 Berlin Heidelberg: Springer; 2012.
- 550 30. Fan J, McCandliss BD, Fossella J, Flombaum JI, Posner MI. The  
551 activation of attentional networks. *NeuroImage*. 2005;26: 471–479.  
552 doi:10.1016/j.neuroimage.2005.02.004
- 553 31. Mu Y-M, Huang X-D, Zhu S, Hu Z-F, So K-F, Ren C-R, et al. Alerting  
554 effects of light in healthy individuals: a systematic review and meta-analysis.  
555 *Neural Regen Res*. 2022;17: 1929. doi:10.4103/1673-5374.335141
- 556 32. Tonetti L, Natale V. Effects of a single short exposure to blue light on  
557 cognitive performance. *Chronobiol Int*. 2019;36: 725–732.  
558 doi:10.1080/07420528.2019.1593191
- 559 33. Faul F, Erdfelder E, Buchner A, Lang A-G. Statistical power analyses  
560 using G\*Power 3.1: Tests for correlation and regression analyses. *Behav Res*  
561 *Methods*. 2009;41: 1149–1160. doi:10.3758/BRM.41.4.1149

- 562 34. Steyer R, Notz P, Schwenkmezger P, Eid M. MDBF - Der  
563 Mehrdimensionale Befindlichkeitsfragebogen. Göttingen: Hogrefe Verlag;  
564 1997. Available: <https://www.testzentrale.de/shop/der-mehrdimensionale->  
565 [befindlichkeitsfragebogen.html](https://www.testzentrale.de/shop/der-mehrdimensionale-befindlichkeitsfragebogen.html)
- 566 35. Deutscher Wetterdienst. Wetter und Klima - Deutscher Wetterdienst -  
567 Thema des Tages - Sonnenbrand hinter Glas? 2022 [cited 1 Feb 2024].  
568 Available: [https://www.dwd.de/DE/wetter/thema\\_des\\_tages/2022/4/24.html](https://www.dwd.de/DE/wetter/thema_des_tages/2022/4/24.html)
- 569 36. Kent ST, McClure LA, Crosson WL, Arnett DK, Wadley VG,  
570 Sathiakumar N. Effect of sunlight exposure on cognitive function among  
571 depressed and non-depressed participants: a REGARDS cross-sectional study.  
572 *Environ Health*. 2009;8: 34. doi:10.1186/1476-069X-8-34
- 573 37. Fan J, McCandliss BD, Sommer T, Raz A, Posner MI. Testing the  
574 Efficiency and Independence of Attentional Networks. *J Cogn Neurosci*.  
575 2002;14: 340–347. doi:10.1162/089892902317361886
- 576
- 577

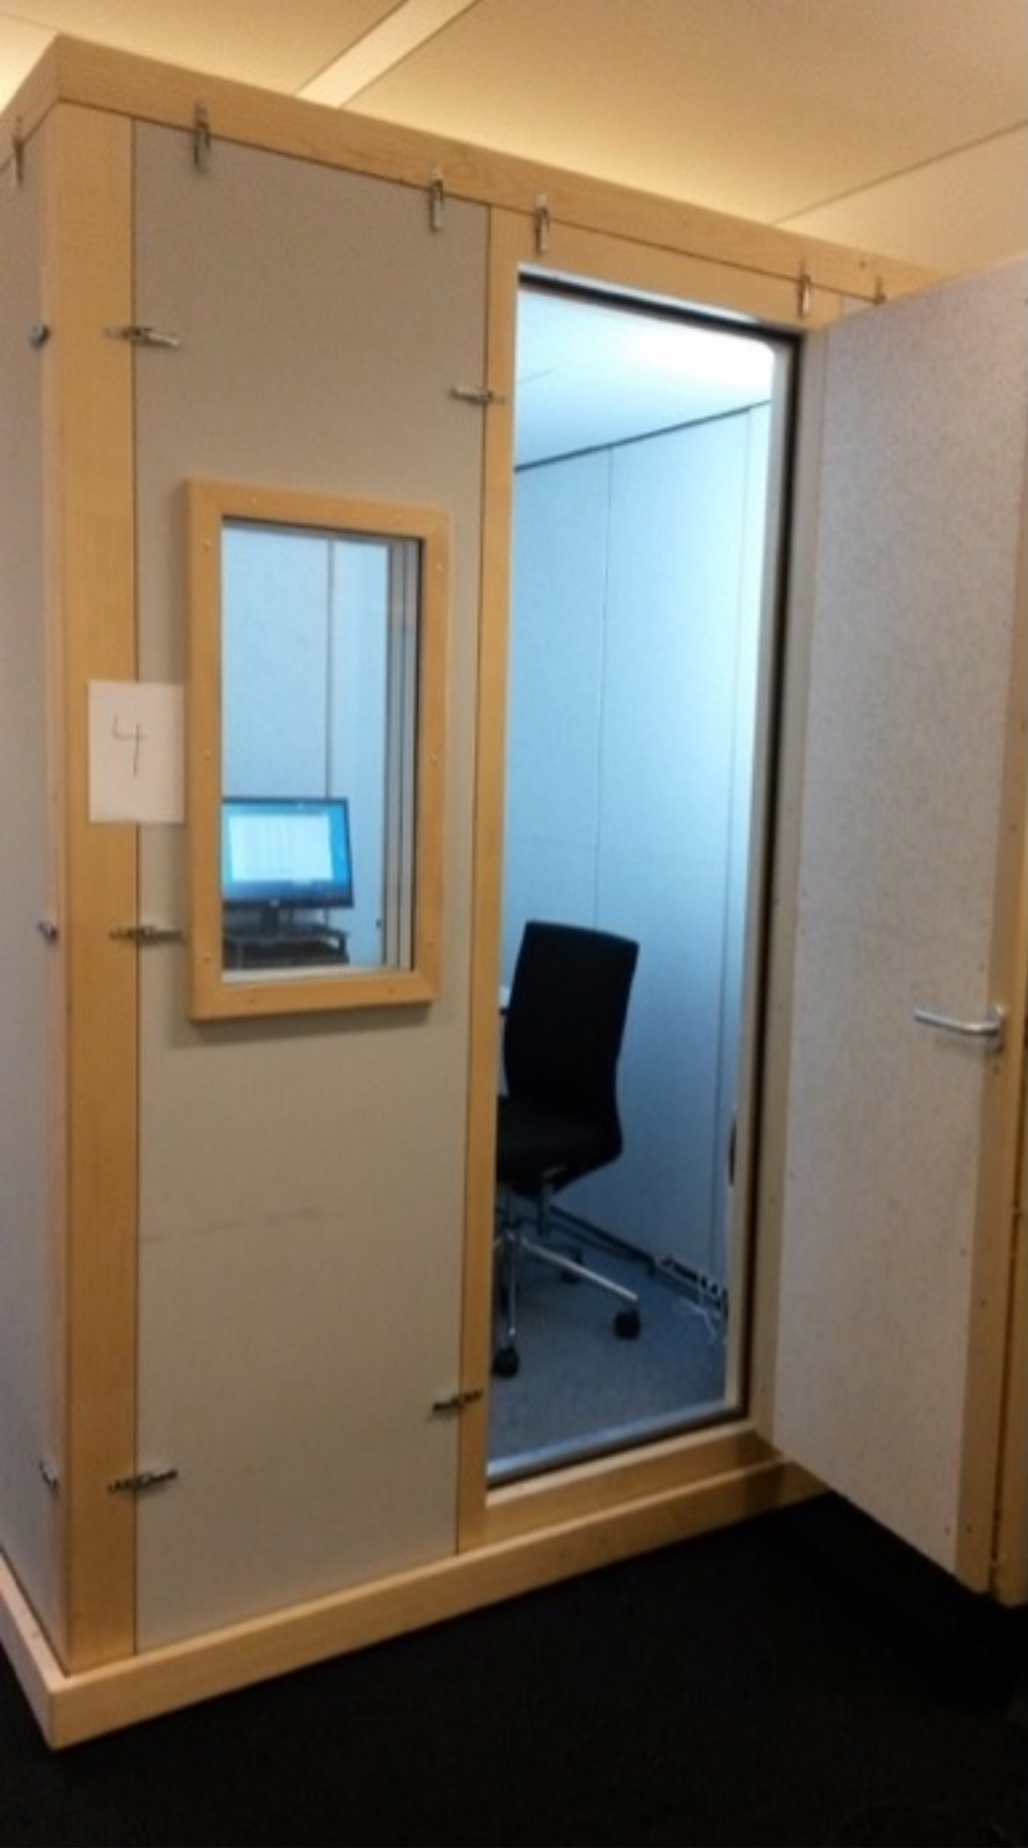

Figure 01

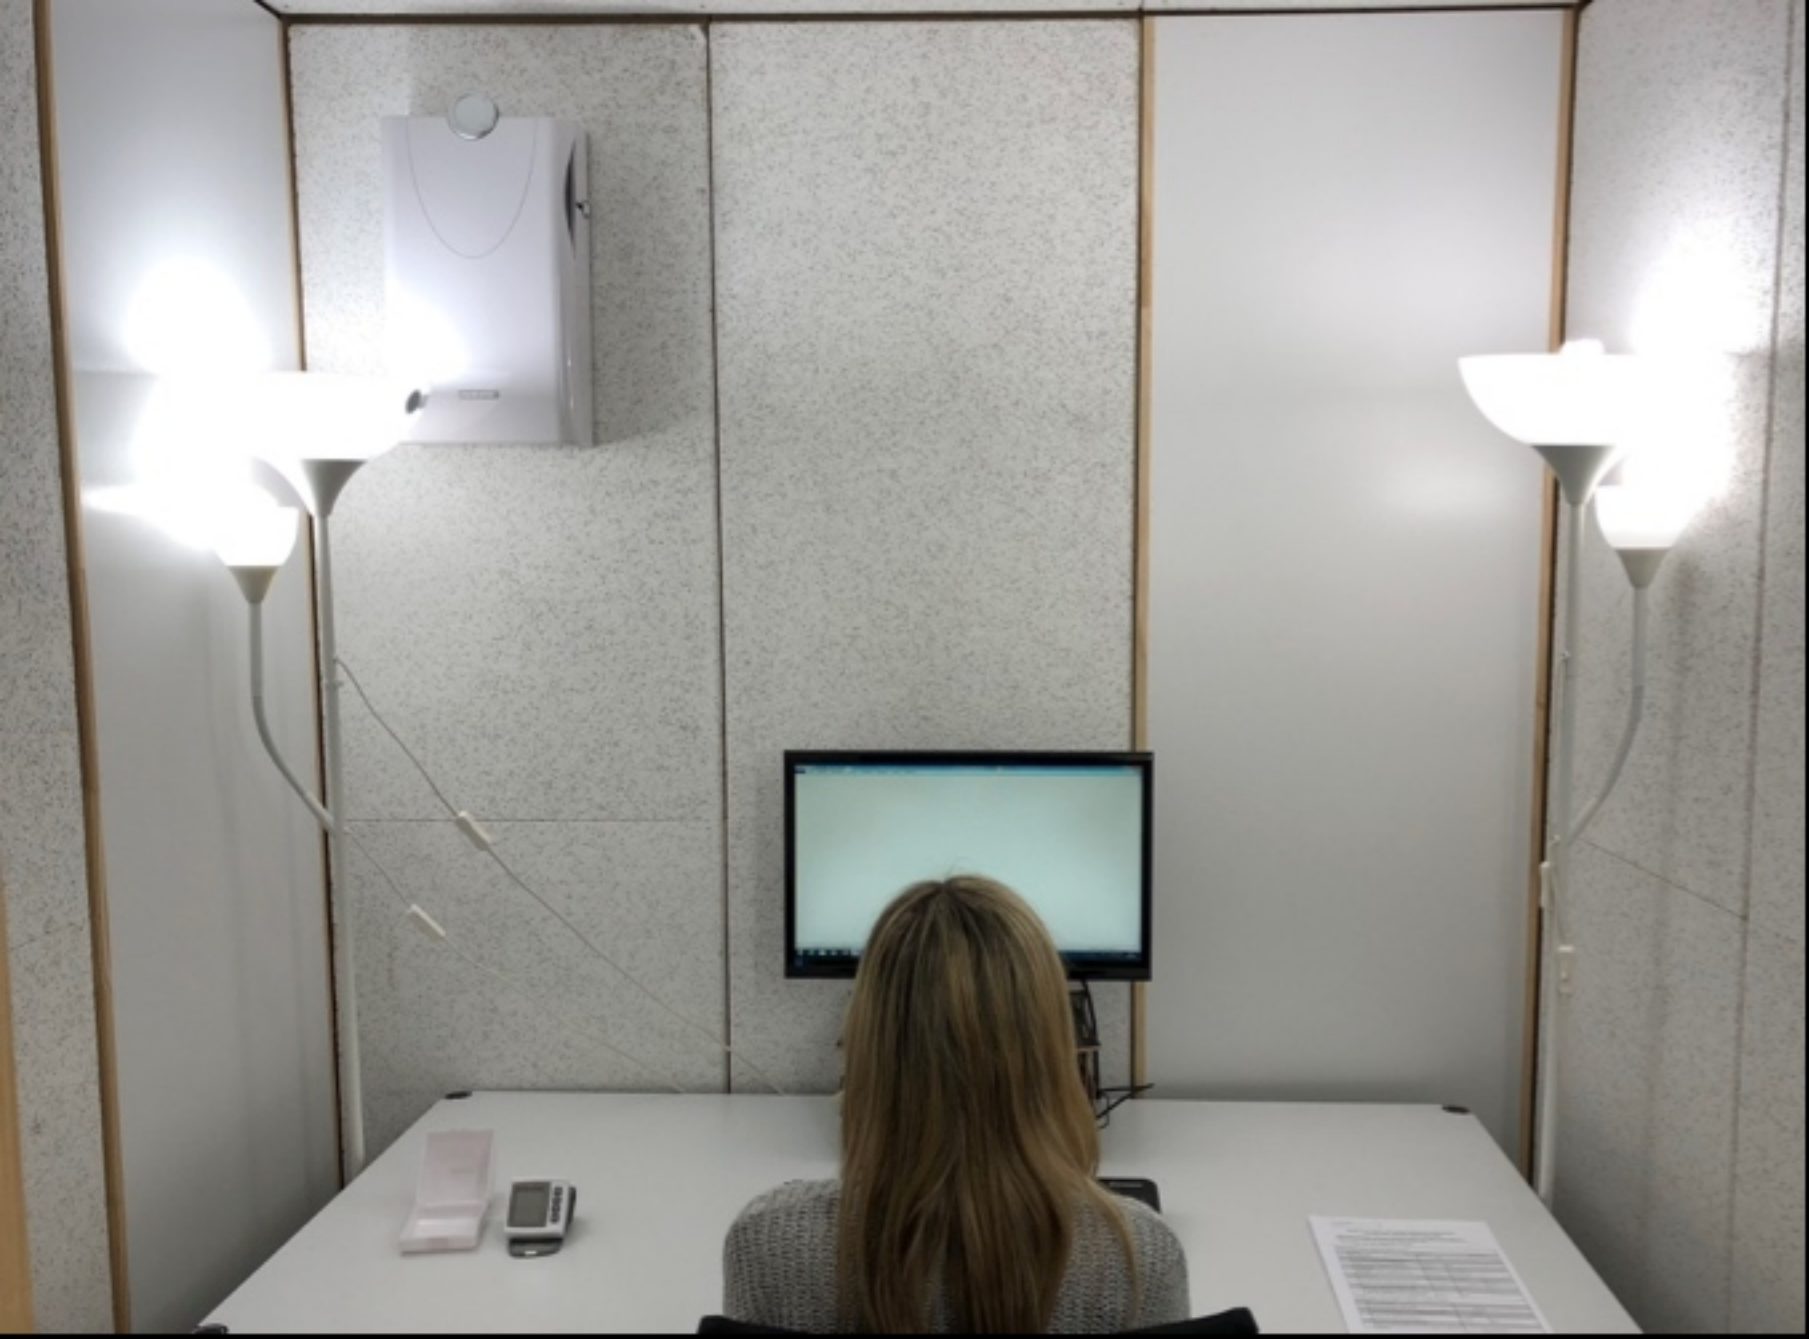

Figure 02

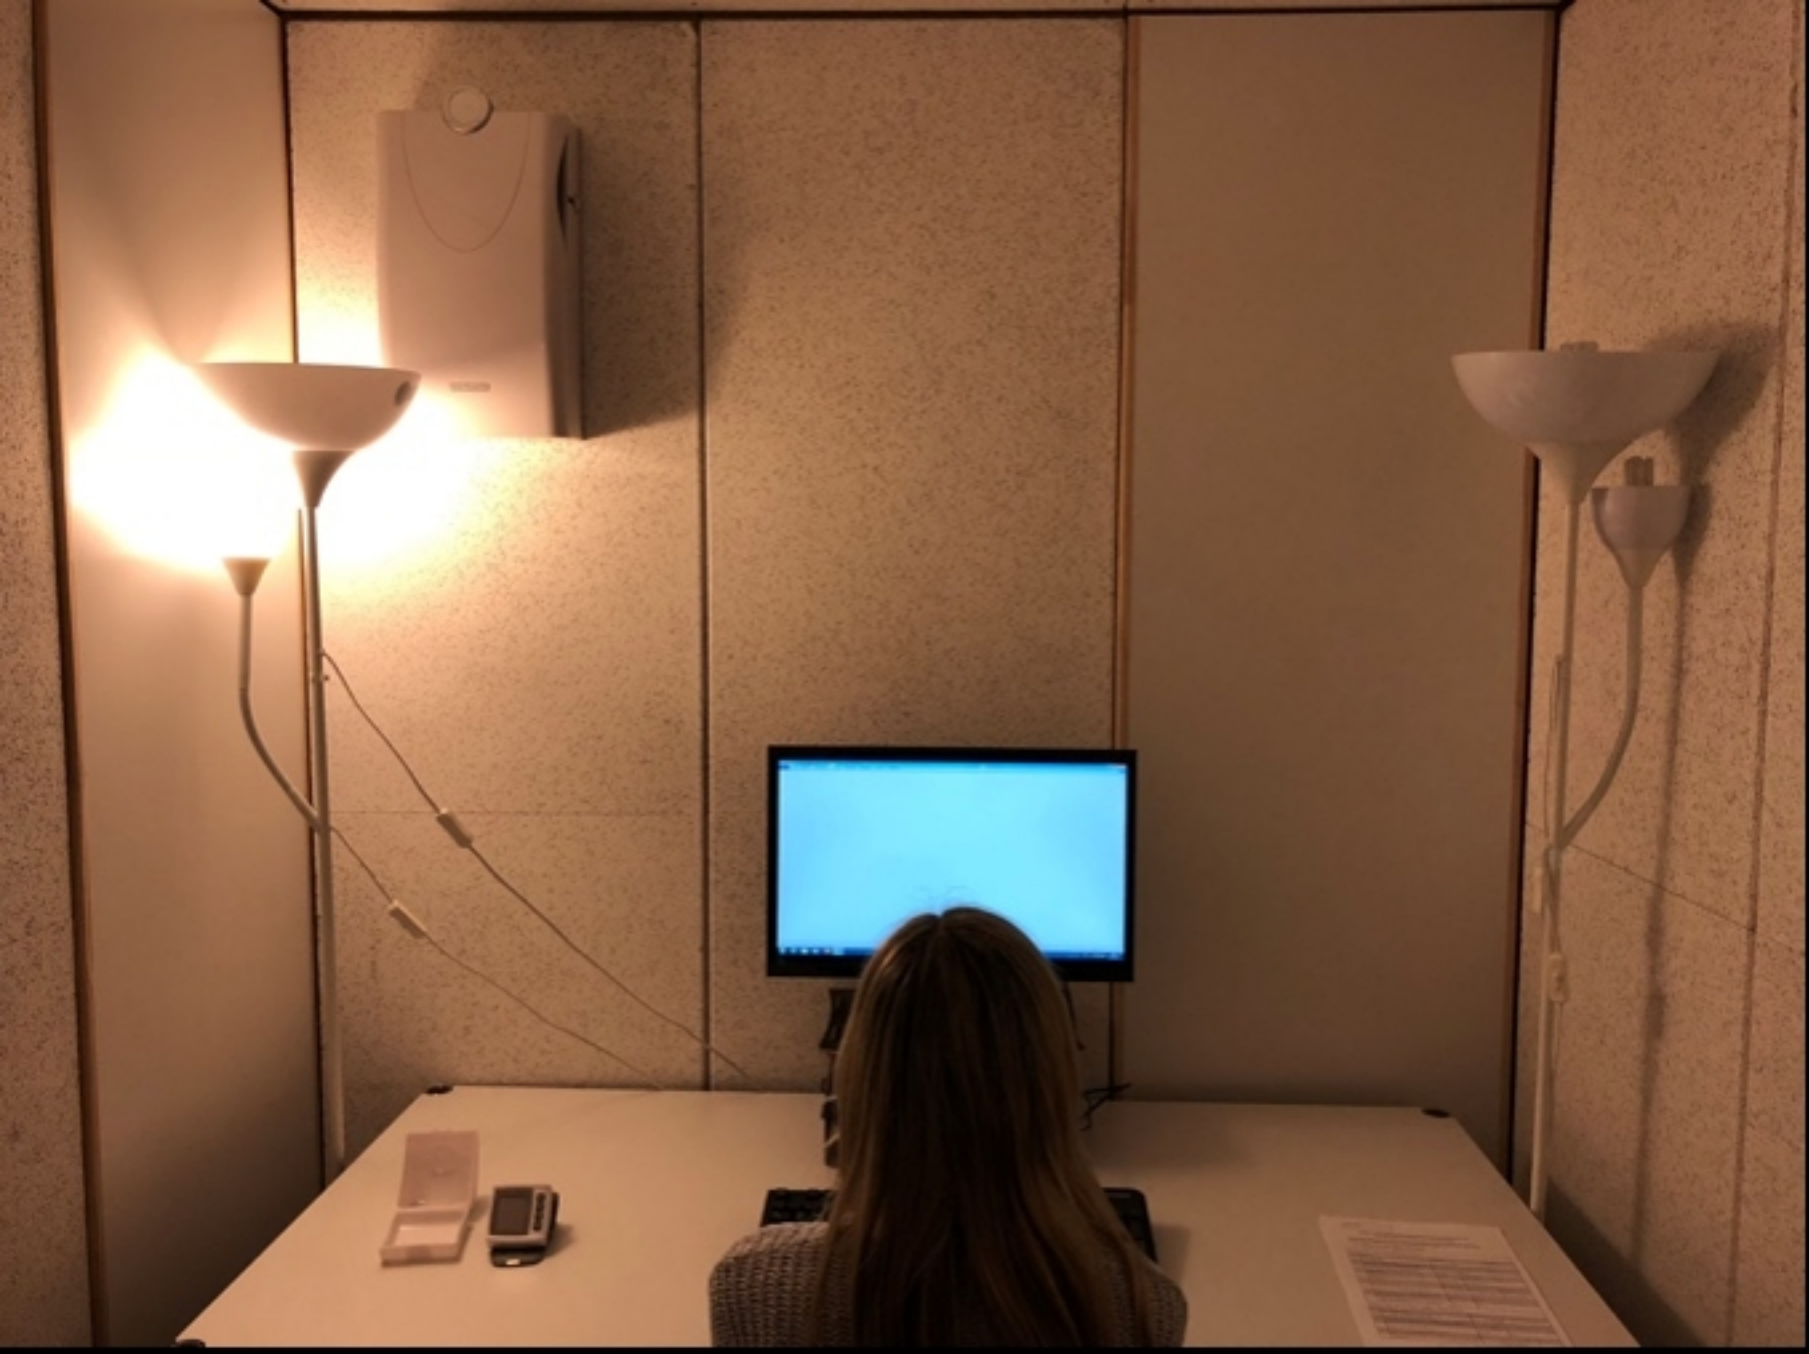

Figure 03



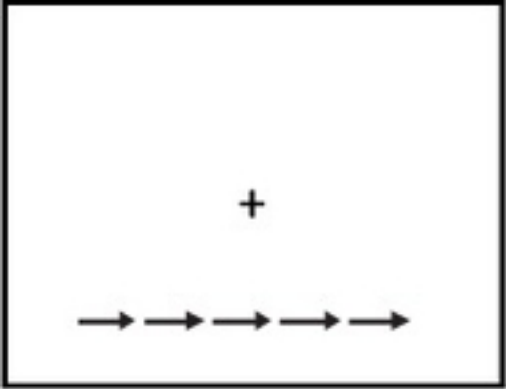

a

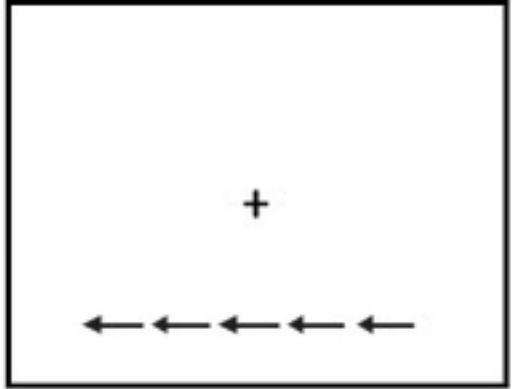

b

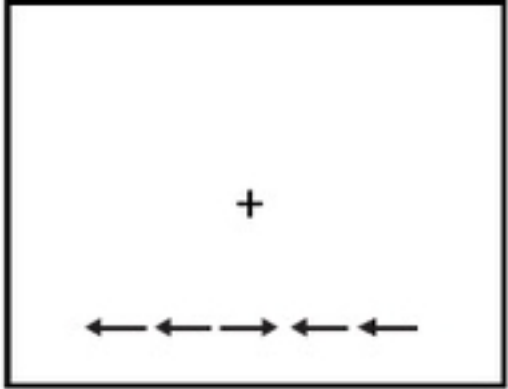

c

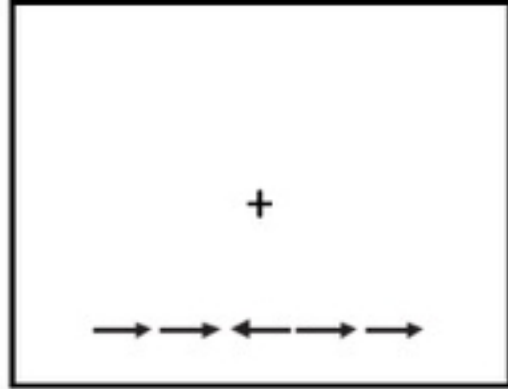

d

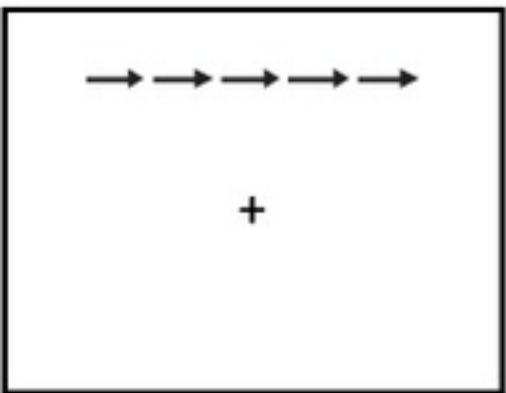

e

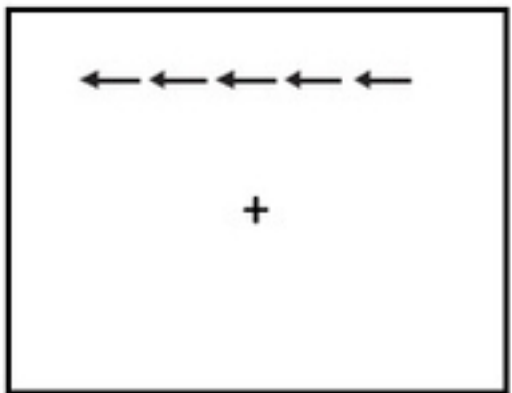

f

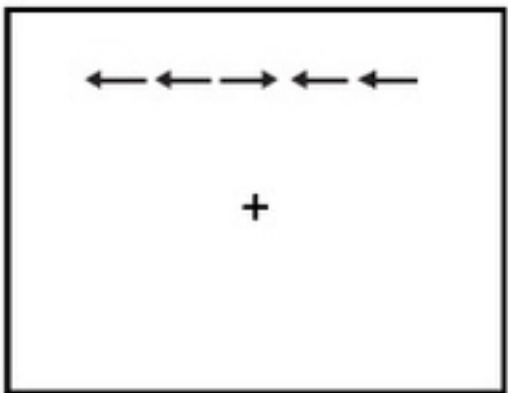

g

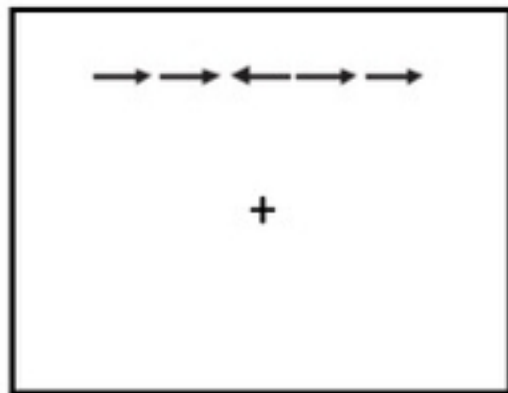

h

Figure 04

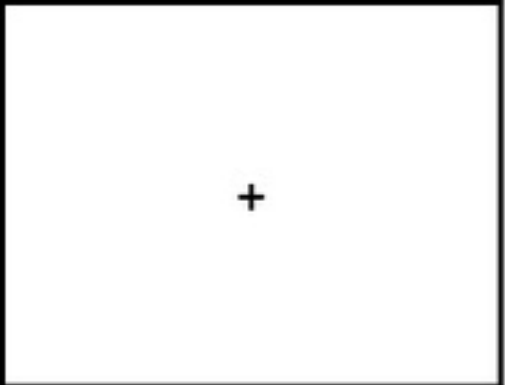

a

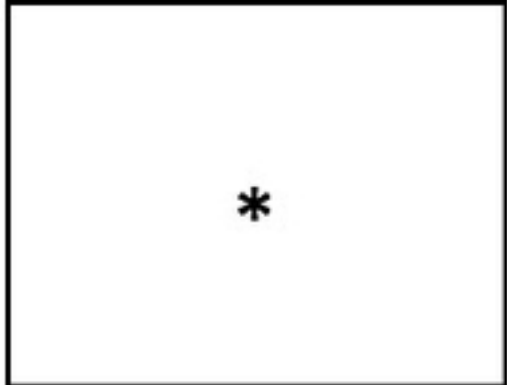

b

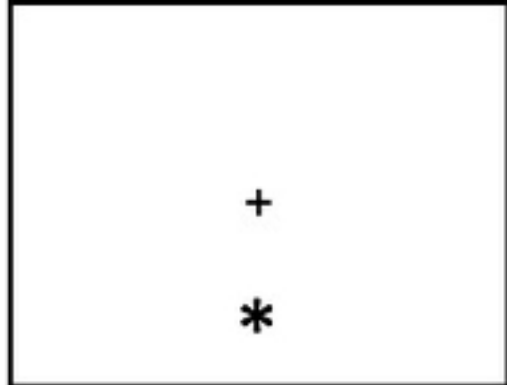

c

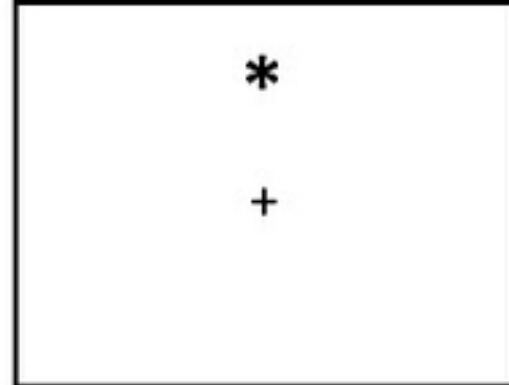

d

Figure 05
